# Supplementary material
Source: publisher site journal article supplement (https://www.dovepress.com/article/107991)
Supplement: Supplementary file 1 [file get_supplementary_file.php]

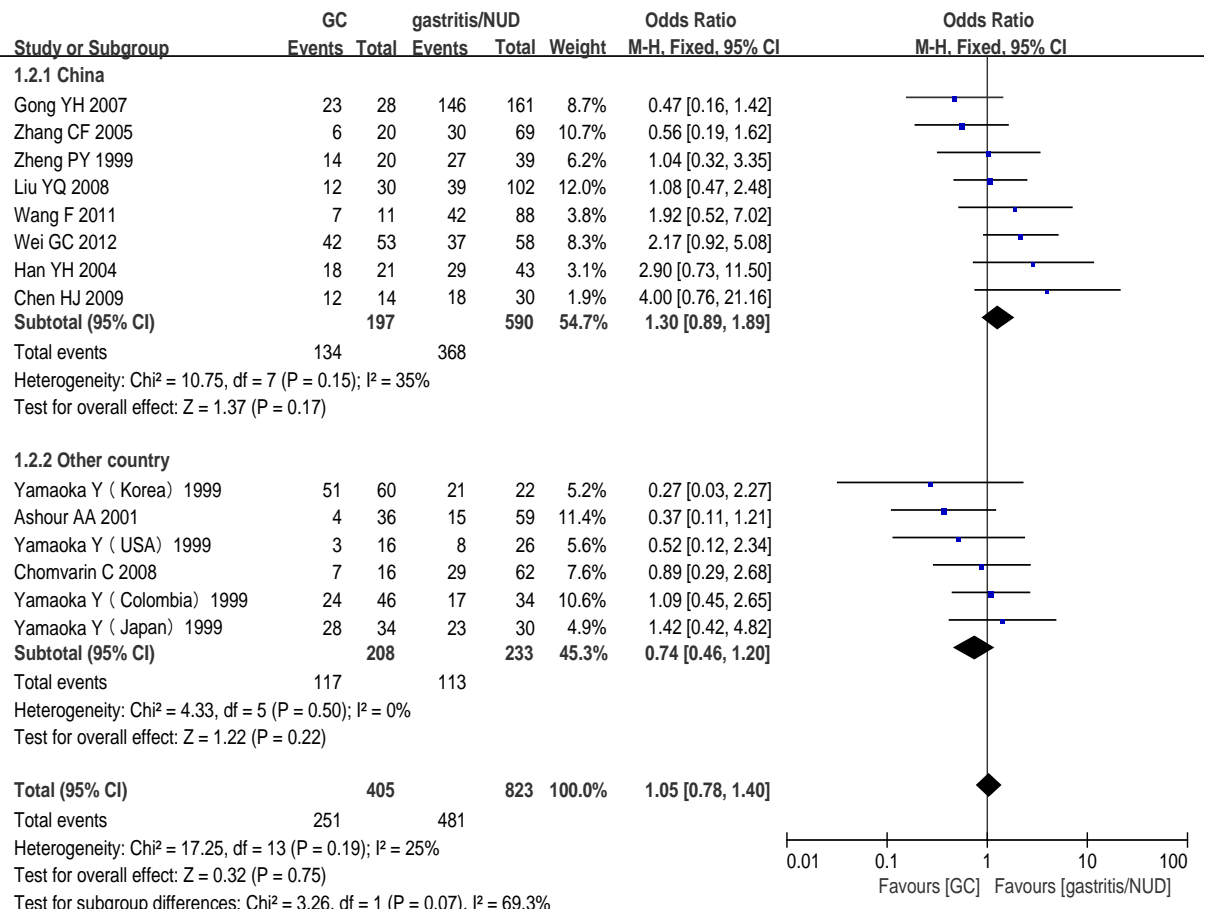

Figure S1. Forest plot for the risk of *iceA1* gene and gastric carcinoma compared with gastritis or non-ulcer dyspepsia.

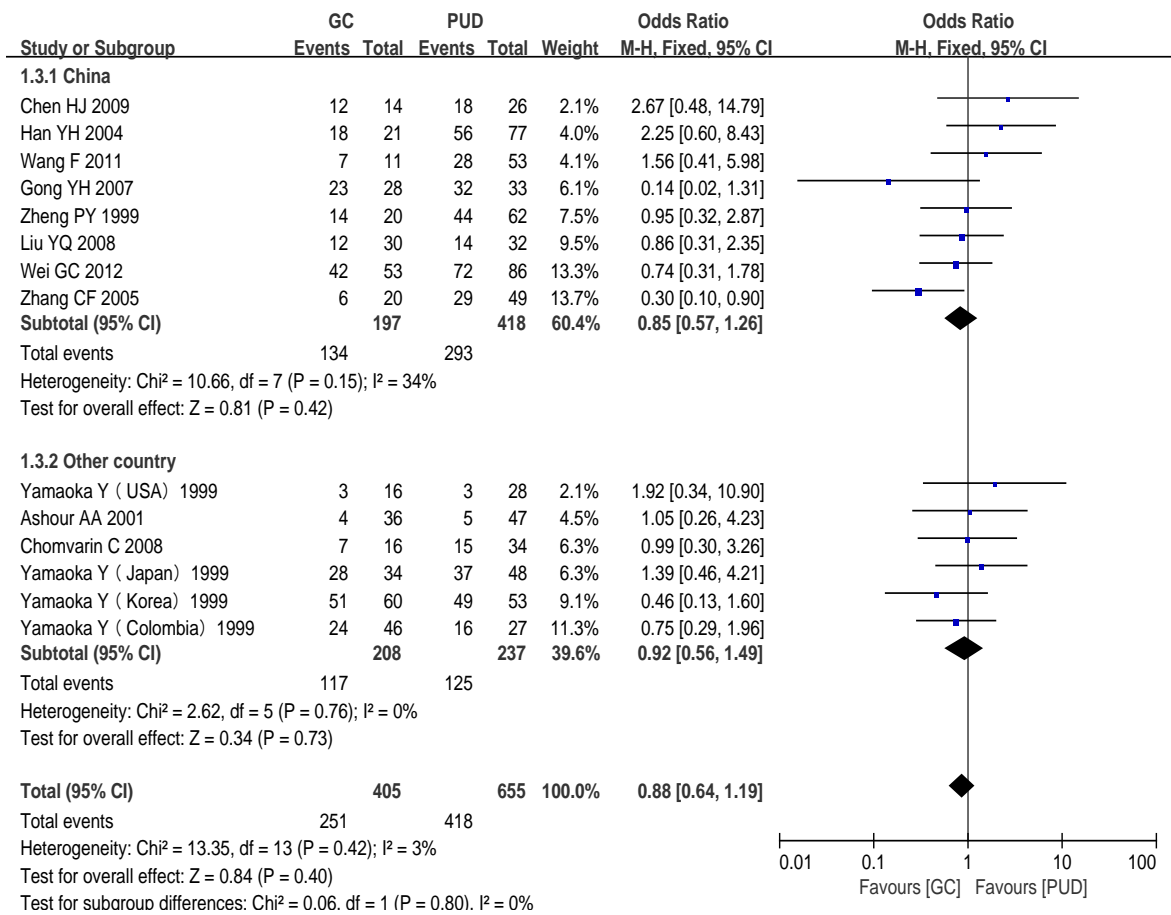

Figure S2. Forest plot for the risk of *iceAI* gene and gastric carcinoma compared with peptic ulcer disease.

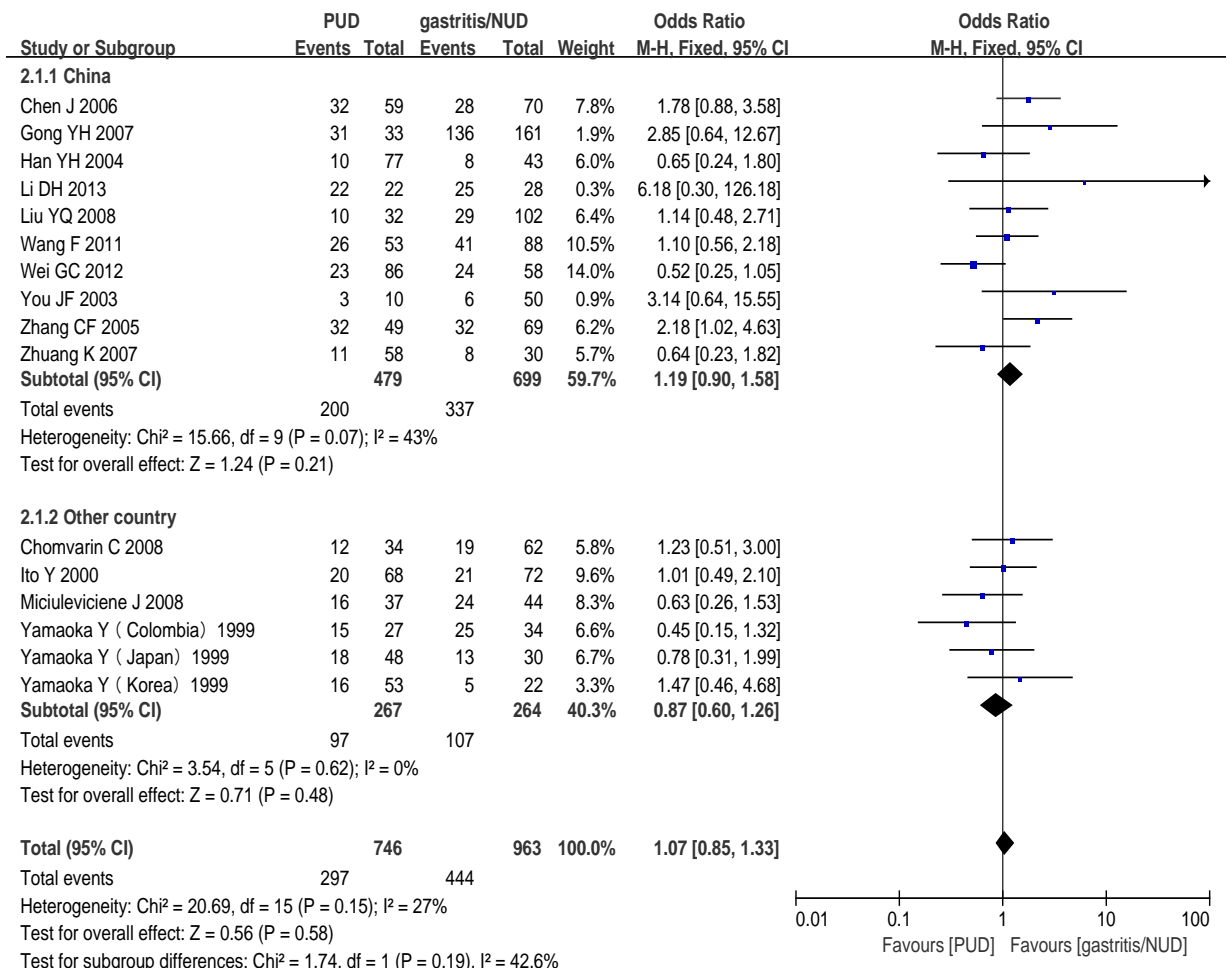

Figure S3. Forest plot for the risk of *iceA2* gene and peptic ulcer disease compared with gastritis or non-ulcer dyspepsia.

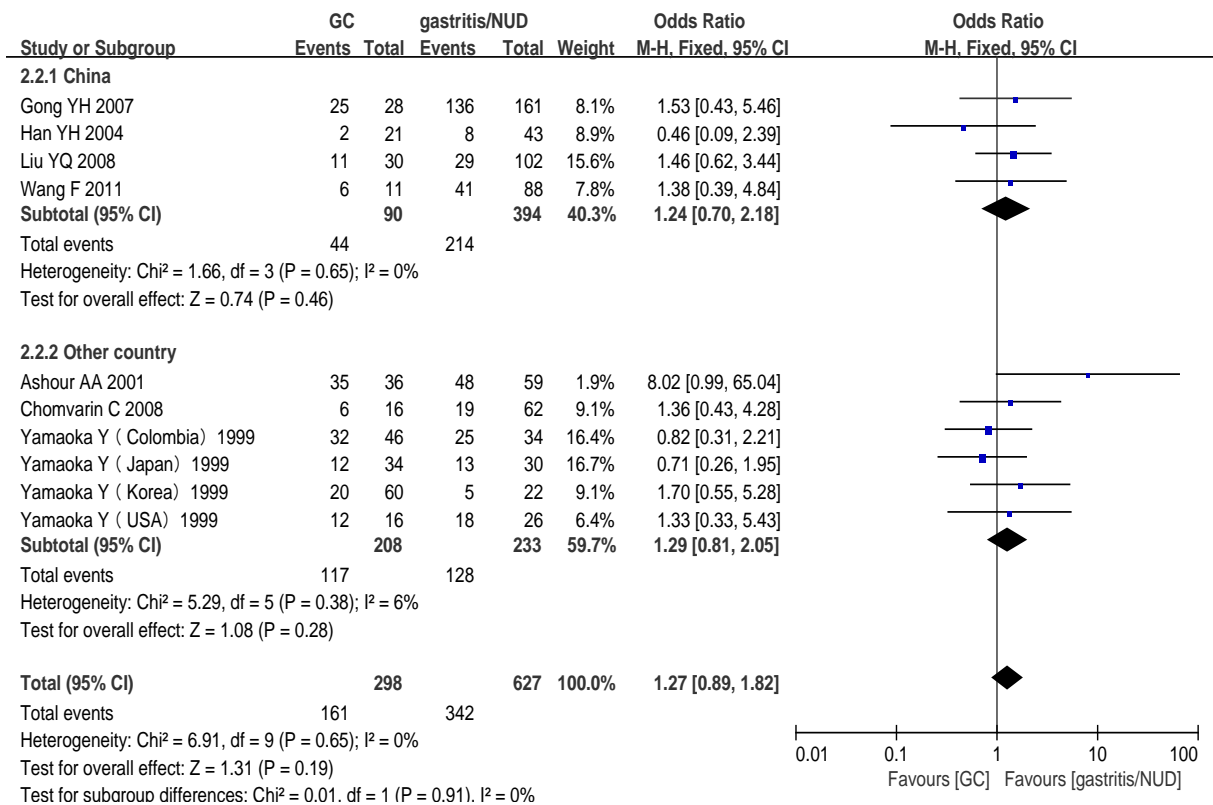

Figure S4. Forest plot for the risk of *iceA2* gene and gastric carcinoma compared with gastritis or non-ulcer dyspepsia.

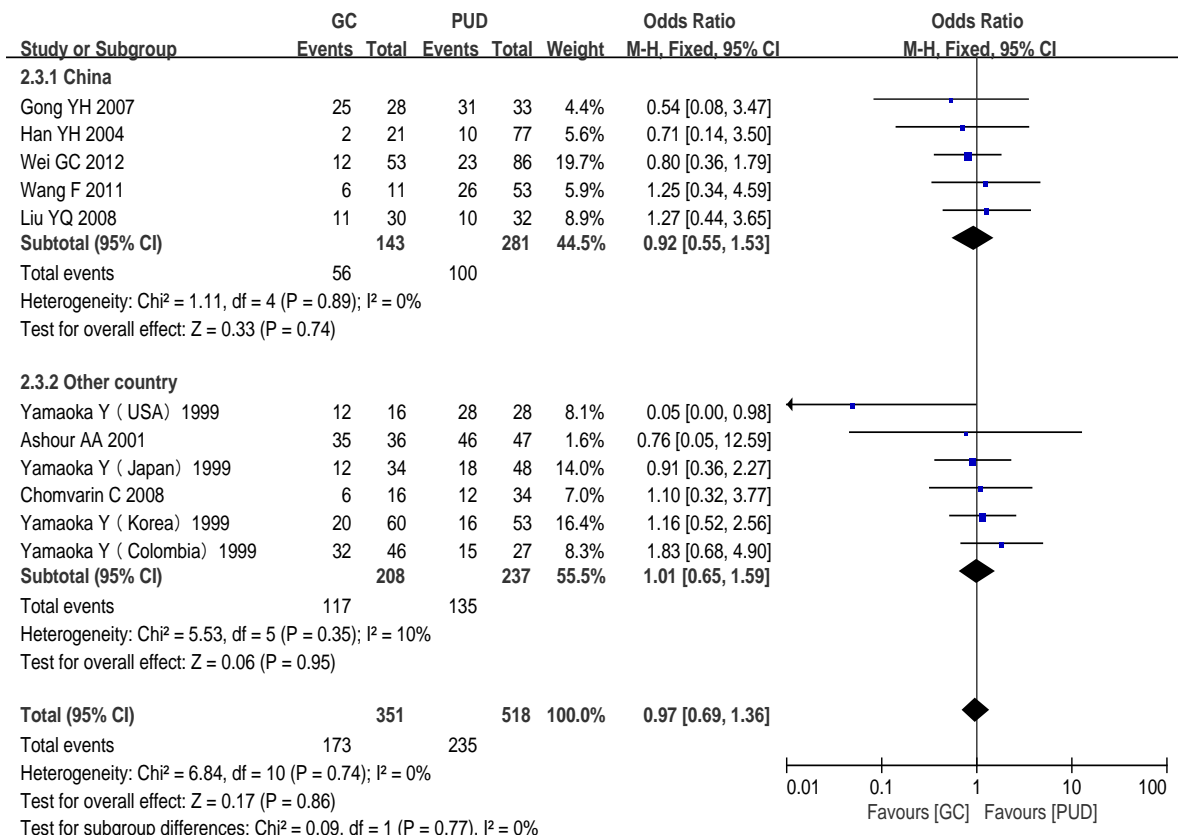

Figure S5. Forest plot for the risk of *iceA2* gene and gastric carcinoma compared with peptic ulcer disease.

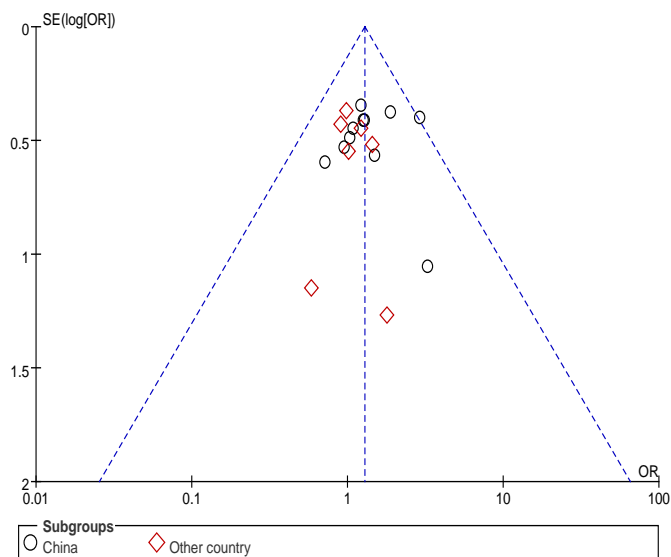

Figure S6. Funnel plot for publish bias assessment of the risk of *iceA1* gene and peptic ulcer disease compared with gastritis or non-ulcer dyspepsia.

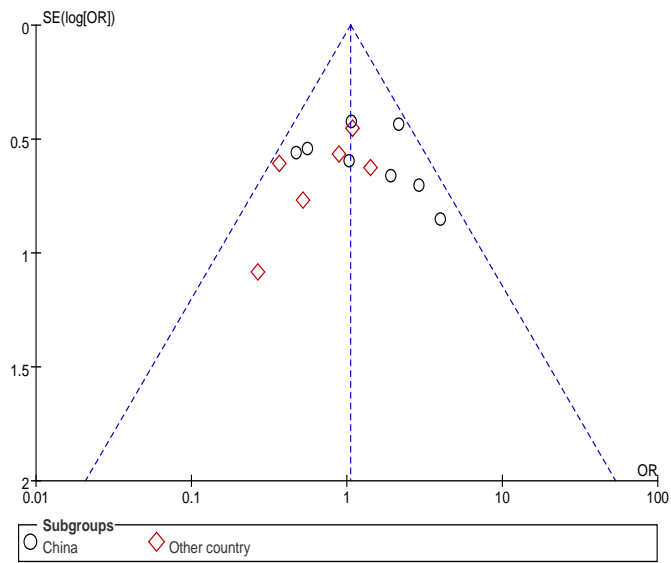

Figure S7. Funnel plot for publish bias assessment of the risk of *iceA1* gene and gastric carcinoma compared with gastritis or non-ulcer dyspepsia.

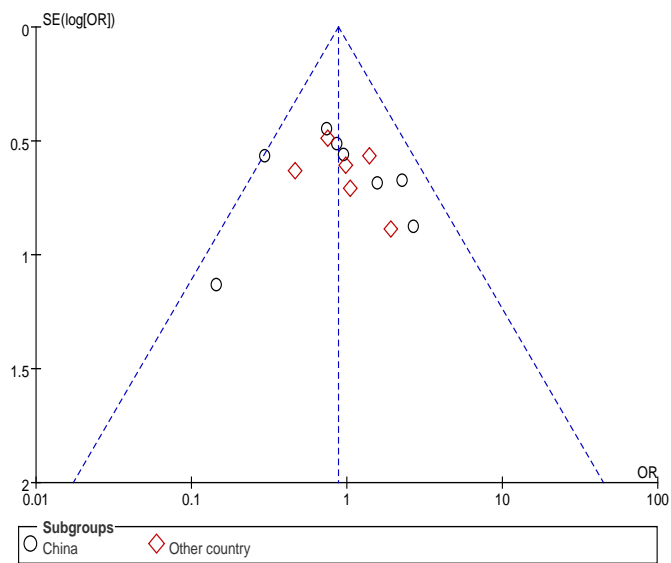

Figure S8. Funnel plot for publish bias assessment of the risk of *iceA1* gene and gastric carcinoma compared with peptic ulcer disease.

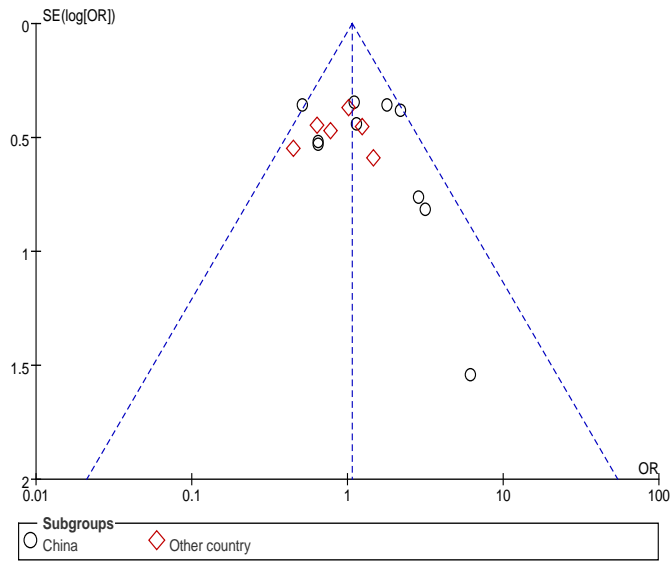

Figure S9. Funnel plot for publish bias assessment of the risk of *iceA2* gene and peptic ulcer disease compared with gastritis or non-ulcer dyspepsia.

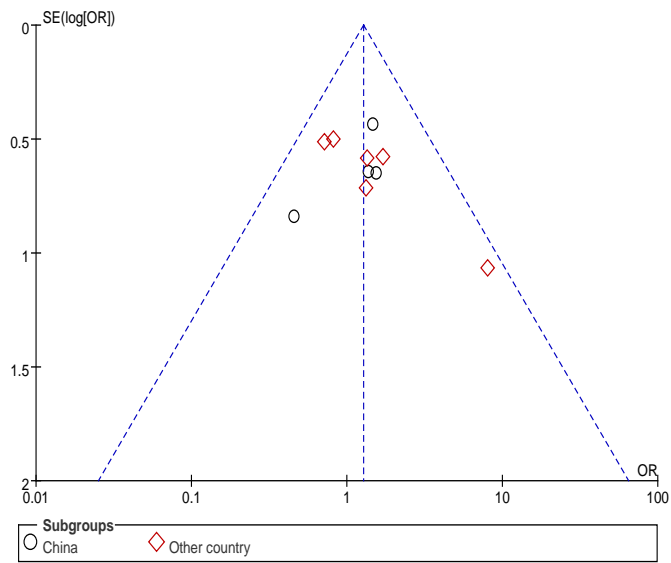

Figure S10. Funnel plot for publish bias assessment of the risk of *iceA2* gene and gastric carcinoma compared with gastritis or non-ulcer dyspepsia.

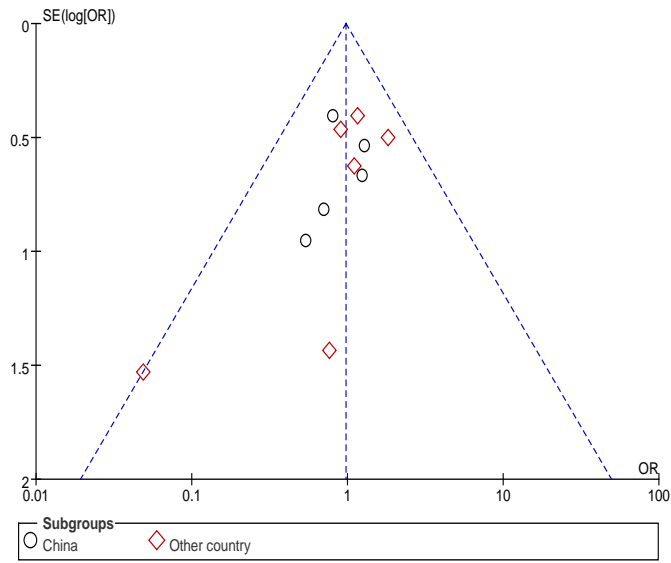

Figure S11. Funnel plot for publish bias assessment of the risk of *iceA2* gene and gastric carcinoma compared with peptic ulcer disease.
